# Supplementary material for: Optimization and Validation of Reverse Transcription Recombinase-Aided Amplification (RT-RAA) for Sorghum Mosaic Virus Detection in Sugarcane
Source: MDPI journal article supplement (doi:10.3390/pathogens12081055), 2023-08-18
Supplement: s1 [file s1]

Supplemental Figure S1

|                     |         |       | Section 1                                                     |     |     |     |     |     |     |  |  |  |
|---------------------|---------|-------|---------------------------------------------------------------|-----|-----|-----|-----|-----|-----|--|--|--|
|                     |         |       | (1)                                                           | 1   | 10  | 20  | 30  | 40  | 59  |  |  |  |
| SrMV-xos (AJ310197) | RAA-seq | (1)   | AGTCAGCTCTATTTCAACCAAACCTCCACCACAGTTTATGTAATAAAATACAAAGCATGC  |     |     |     |     |     |     |  |  |  |
|                     |         | (1)   | AGTCAGCTCTATTTCAACCAAACCTCCACCACAGTTTATGTAATAAAATACAAAGCATGC  |     |     |     |     |     |     |  |  |  |
|                     |         | (1)   | AGTCAGCTCTATTTCAACCAAACCTCCACCACAGTTTATGTAATAAAATACAAAGTATGC  |     |     |     |     |     |     |  |  |  |
|                     |         |       | Section 2                                                     |     |     |     |     |     |     |  |  |  |
|                     |         |       | (60)                                                          | 60  | 70  | 80  | 90  | 100 | 118 |  |  |  |
| SrMV-xos (AJ310197) | RAA-seq | (60)  | AAAGAAGAGGCTATAAGTACTATTTACTGGTTTGTACCTGATATTTTCAGACTCATTCACT |     |     |     |     |     |     |  |  |  |
|                     |         | (60)  | AAAGAAGAGGCTATAAGTACTATTTACTGGTTTGTACCTGATATCTTTAGACTTATTCACT |     |     |     |     |     |     |  |  |  |
|                     |         | (60)  | AAAGAAGAGGCTATAAGTACTATTTACTGGTTTGTACCTGATATCTTTAGACTTATTCACT |     |     |     |     |     |     |  |  |  |
|                     |         |       | Section 3                                                     |     |     |     |     |     |     |  |  |  |
|                     |         |       | (119)                                                         | 119 | 130 | 140 | 150 | 160 | 177 |  |  |  |
| SrMV-xos (AJ310197) | RAA-seq | (119) | ATATTATTATATTAGGTTTACTATCAACTATTACGAATGCAGTTATTTTAACAATGCA    |     |     |     |     |     |     |  |  |  |
|                     |         | (119) | ATATTATTATATTAGGTTTACTTTTCGACTATTGCAATGCAGTTATTTTAACAATGCA    |     |     |     |     |     |     |  |  |  |
|                     |         | (119) | ATATTATTATATTAGGTTTACTTTTCGACTATTGCAATGCAGTTATTTTAACAATGCA    |     |     |     |     |     |     |  |  |  |
|                     |         |       | Section 4                                                     |     |     |     |     |     |     |  |  |  |
|                     |         |       | (178)                                                         | 178 | 190 | 200 | 210 | 220 | 236 |  |  |  |
| SrMV-xos (AJ310197) | RAA-seq | (178) | GGATTACAAGAACTACAAAAACAAGTTAGAGAAGAGGAATACGAACGAGAGTTAGCG     |     |     |     |     |     |     |  |  |  |
|                     |         | (178) | GGATTACAAGAACTTACAAAAACAAGTTAGAGAAGAGGAATATGAACGAGAGTTAGCG    |     |     |     |     |     |     |  |  |  |
|                     |         | (178) | GGATTACAAGAACTTACAAAAACAAGTTAGAGAAGAGGAGTATGAACGAGAGTTAGCG    |     |     |     |     |     |     |  |  |  |
|                     |         |       | Section 5                                                     |     |     |     |     |     |     |  |  |  |
|                     |         |       | (237)                                                         | 237 | 244 |     |     |     |     |  |  |  |
| SrMV-xos (AJ310197) | RAA-seq | (237) | AAGTGAGA                                                      |     |     |     |     |     |     |  |  |  |
|                     |         | (237) | AAGTGAGA                                                      |     |     |     |     |     |     |  |  |  |
|                     |         | (237) | AAGTGAGA                                                      |     |     |     |     |     |     |  |  |  |

Figure S1. The fragment amplified by RAA was recovered by gel electrophoresis, the recovered DNA fragment was cloned into T-vector and sequenced, the sequence (RAA-seq) obtained was aligned with two known SrMV isolates SrMV-xos and SrMV-yh.
